# Supplementary material for: Key Programme Science lessons from an HIV prevention ‘Learning Site’ for sex workers in Mombasa, Kenya
Source: PubMed Central journal article supplement (PMC6204943; doi:10.1136/sextrans-2017-053228), 2017-12-14
Supplement: sextrans-2017-053228supp002.pdf [file sextrans-2017-053228supp002.pdf]

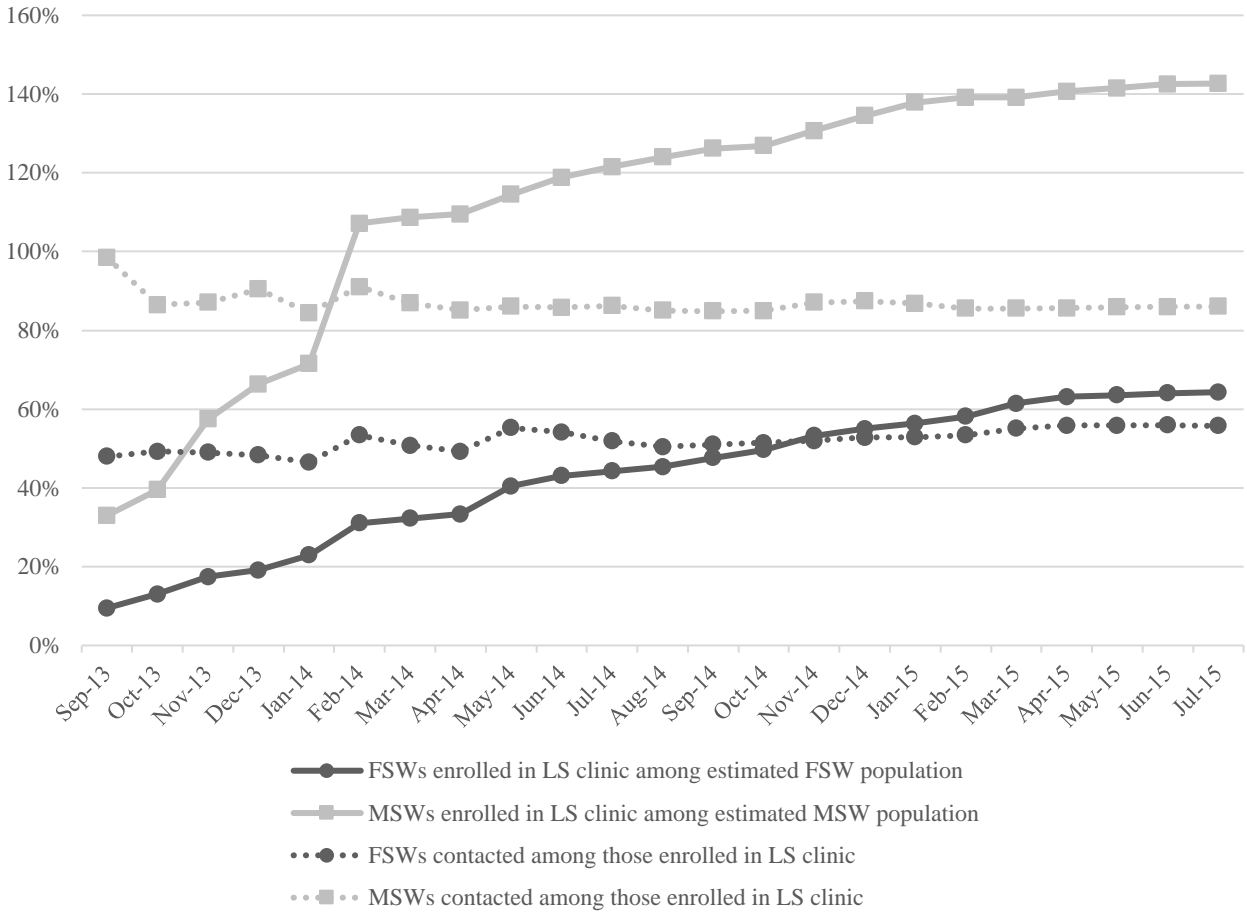

**Web figure 1.** Cumulative, monthly enrolment with the Learning Site clinic among estimated sex worker populations, and proportion of outreach-enrolled sex workers enrolling in the Learning Site clinic per month, September 2013 through July 2015.

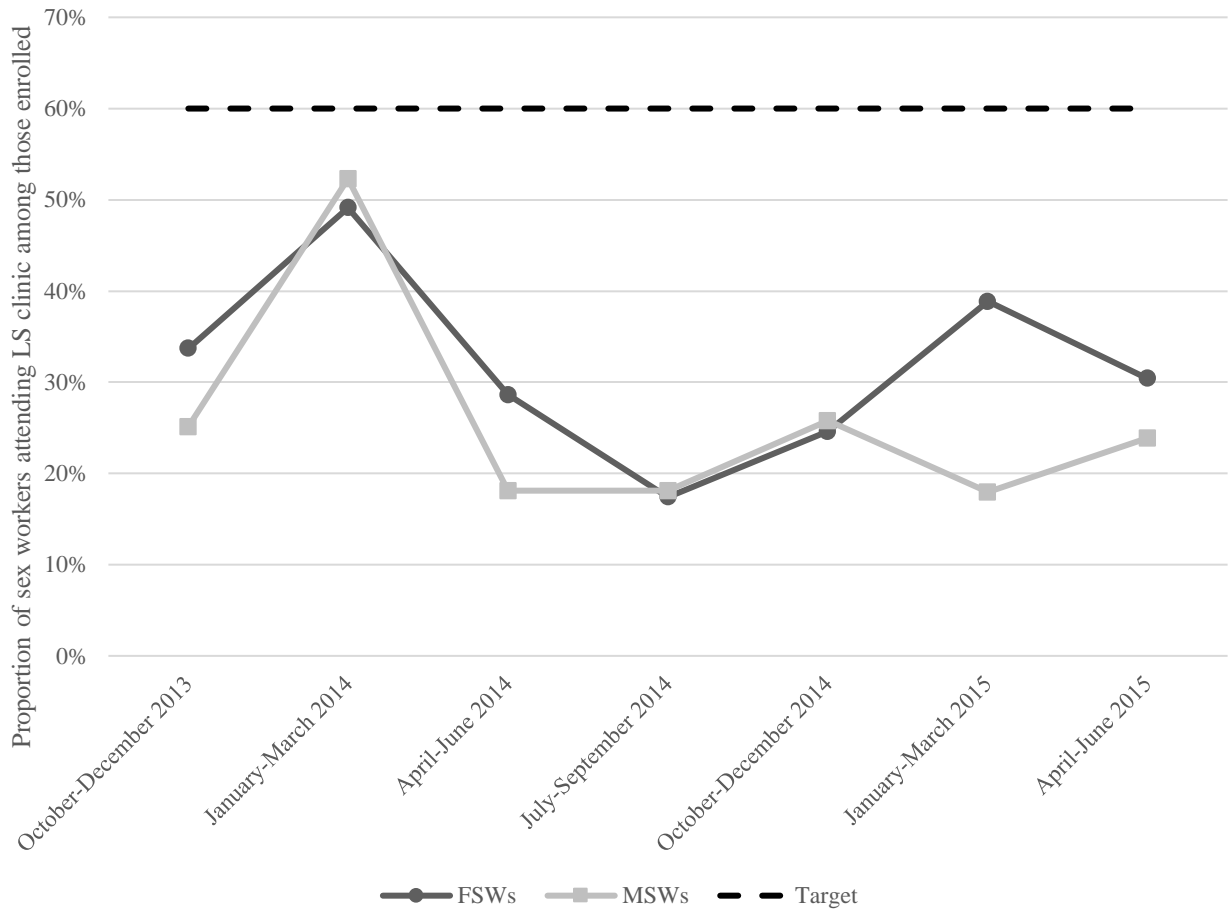

**Web figure 2.** Quarterly clinic attendance among sex workers enrolled with the Learning Site clinic, October 2013 through June 2015.

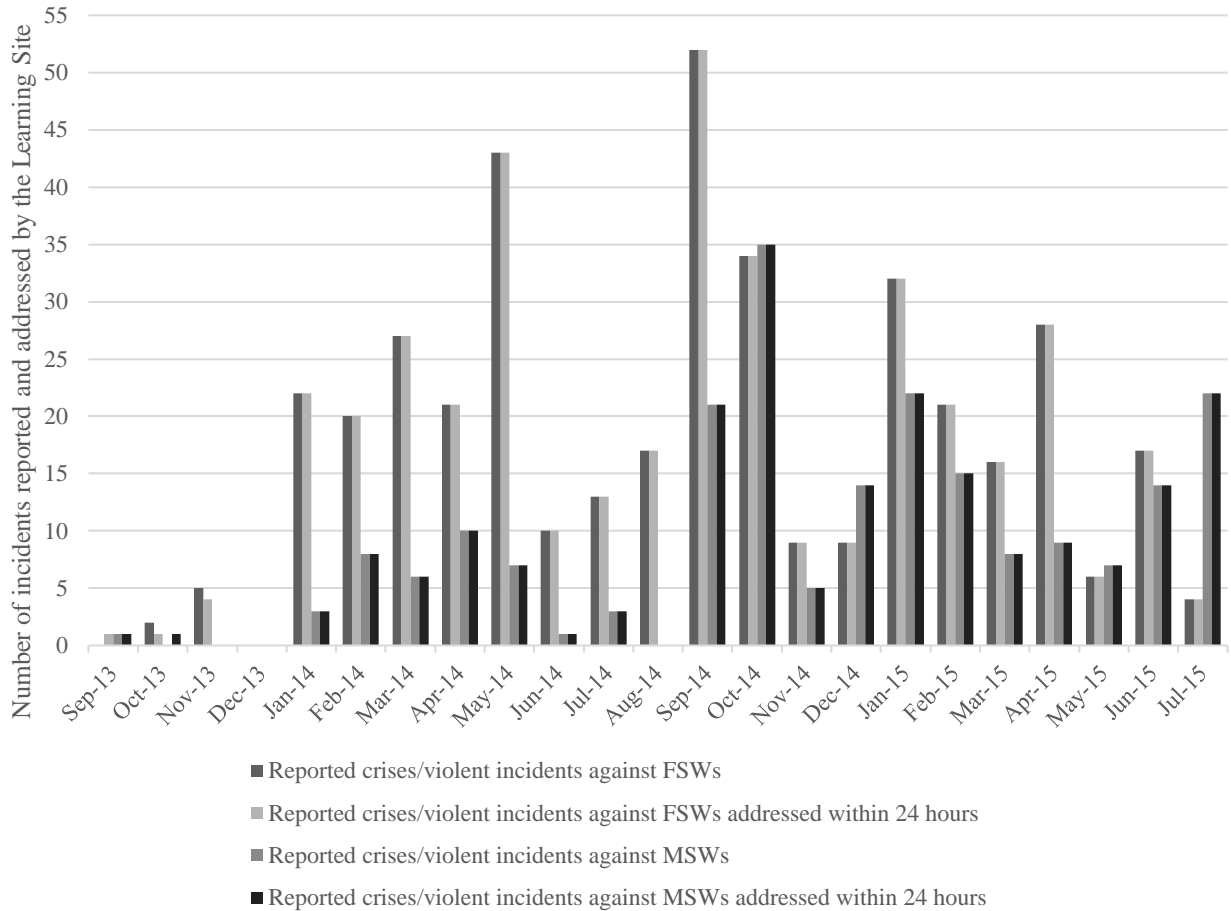

**Web figure 3.** Reports of and response to violent incidents among sex workers, and timely responses to violence, following sensitisation programmes organised by the Mombasa Learning Site, September 2013 through July 2015.
